# Supplementary material for: Aberrant splicing in human cancer has a large-scale functional impact on transcription factors
Source: Research Square preprint supplement (doi:10.21203/rs.3.rs-7799323/v1), 2025-11-11
Supplement: Supplementary file 1 [file 06afb239c851fae460ad8b94.xlsx]

## Sheet: BLCA
SYMBOL

## Sheet: BRCA
SYMBOL

## Sheet: COAD
SYMBOL

## Sheet: ESCA
SYMBOL

## Sheet: HNSC
SYMBOL

## Sheet: KICH
SYMBOL

## Sheet: KIRC
SYMBOL

## Sheet: KIRP
SYMBOL

## Sheet: LIHC
SYMBOL

## Sheet: LUAD
SYMBOL

[truncated: 5 more sheets: LUSC, PRAD, STAD, THCA, UCEC]
