# Supplementary material for: Aberrant splicing in human cancer has a large-scale functional impact on transcription factors
Source: Research Square preprint supplement (doi:10.21203/rs.3.rs-7799323/v1), 2025-11-11
Supplement: Supplementary file 3 [file 366b59565f1fade77eda70c2.xlsx]

## Sheet: BLCA
AS_ID

## Sheet: BRCA
AS_ID

## Sheet: COAD
AS_ID

## Sheet: HNSC
AS_ID

## Sheet: KICH
AS_ID

## Sheet: KIRC
AS_ID

## Sheet: KIRP
AS_ID

## Sheet: LIHC
AS_ID

## Sheet: LUAD
AS_ID

## Sheet: LUSC
AS_ID

[truncated: 4 more sheets: PRAD, STAD, THCA, UCEC]
