# Supplementary material for: Aberrant splicing in human cancer has a large-scale functional impact on transcription factors
Source: Research Square preprint supplement (doi:10.21203/rs.3.rs-7799323/v1), 2025-11-11
Supplement: Supplementary file 5 [file a9889a38a6816687073309f5.xlsx]

## Sheet: PTSE-cancer combinations
AS_ID
