# Supplementary material for: Aberrant splicing in human cancer has a large-scale functional impact on transcription factors
Source: Research Square preprint supplement (doi:10.21203/rs.3.rs-7799323/v1), 2025-11-11
Supplement: Supplementary file 6 [file cc326ef05e1ba411eacc2450.xlsx]

## Sheet: BLCA
CANCER

## Sheet: BRCA
CANCER

## Sheet: COAD
CANCER

## Sheet: HNSC
CANCER

## Sheet: KIRC
CANCER

## Sheet: LIHC
CANCER

## Sheet: LUAD
CANCER

## Sheet: LUSC
CANCER

## Sheet: PRAD
CANCER

## Sheet: STAD
CANCER

[truncated: 2 more sheets: THCA, UCEC]
